# Supplementary material
Source: PubMed Central journal article supplement (PMC6583884)
Supplement: jamasurg-153-800-s001.pdf [file jamasurg-153-800-s001.pdf]

## Supplementary Online Content

Le TD, Gurney JM, Nnamani NS, et al. A 12-year analysis of nonbattle injury among US service members deployed to Iraq and Afghanistan. *JAMA Surg*. Published online May 30, 2018. doi:10.1001/jamasurg.2018.1166

**eTable 1.** Cumulative Incidence Rate of Battle Injury and Nonbattle Injury

**eTable 2.** Top 10 Possible Causes of NBI by Theater of Operation

**eTable 3.** ARIMA Model Fit

**eFigure 1.** Number of Injured Body Regions per Patient by Injury Classification

**eFigure 2.** Trends in Nonbattle Injury (NBI) Over Time

**eFigure 3.** Regression and Weighted Moving Average

**eFigure 4.** Trend and Correlation Analysis for Cumulative Proportion of NBI

**eFigure 5.** ARIMA (2,0,1) Model

This supplementary material has been provided by the authors to give readers additional information about their work.

**eTable 1.** Cumulative Incidence Rate of Battle Injury and Nonbattle Injury

| Variable                                        | Battle injury | Non-battle injury | P Value |
|-------------------------------------------------|---------------|-------------------|---------|
| Number of patients, No. (%)                     | 19755 (65.9)  | 10203 (34.1)      |         |
| Gender, No. (%)                                 |               |                   | <.001   |
| Male                                            | 19404 (66.9)  | 9599 (33.1)       |         |
| Female                                          | 351 (36.8)    | 604 (63.2)        |         |
| Age at injury, median (IQR), Yr.                | 24 (21-28)    | 25 (21-31)        | <.001   |
| Race, No. (%) <sup>a</sup>                      | 10402 (63.0)  | 6110 (37.0)       | <.001   |
| White                                           | 7645 (65.8)   | 3980 (34.2)       |         |
| Black                                           | 826 (47.9)    | 899 (52.1)        |         |
| Hispanic                                        | 557 (63.4)    | 321 (36.6)        |         |
| Other                                           | 1374 (60.2)   | 910 (39.8)        |         |
| Theater of operation, No. (%)                   |               |                   | <.001   |
| OEF                                             | 7954 (71.0)   | 3250 (29.0)       |         |
| OIF                                             | 11679 (63.7)  | 6655 (36.3)       |         |
| OND                                             | 122 (29.1)    | 298 (70.9)        |         |
| Branch of service, No. (%) <sup>b</sup>         |               |                   | <.001   |
| U.S. Army                                       | 14474 (65.3)  | 7680 (34.7)       |         |
| U.S. Air Force                                  | 273 (33.7)    | 537 (66.3)        |         |
| U.S. Marine Corps                               | 4585 (74.3)   | 1584 (25.7)       |         |
| U.S. Navy                                       | 421 (51.7)    | 394 (48.3)        |         |
| Primary mechanism of injury, No. (%)            |               |                   | <.001   |
| Explosion                                       | 15178 (98.5)  | 236 (1.5)         |         |
| Gunshot wounds (GSW)                            | 3719 (83.6)   | 728 (16.4)        |         |
| Motor vehicle crash (MVC)                       | 275 (12.5)    | 728 (87.5)        |         |
| Helicopter/plane crash                          | 98 (36.7)     | 169 (63.3)        |         |
| Other/Unknown                                   | 485 (6.4)     | 7149 (93.6)       |         |
| Primary type of injury, No. (%)                 |               |                   | <.001   |
| Penetrating                                     | 10010 (83.7)  | 1948 (16.3)       |         |
| Blunt                                           | 9186 (56.5)   | 7080 (43.5)       |         |
| Burn                                            | 479 (48.2)    | 515 (51.8)        |         |
| Other/Unknown                                   | 80 (10.8)     | 660 (89.2)        |         |
| Dominant body region (BR), No. (%) <sup>c</sup> |               |                   |         |
| Head/Neck (BR1)                                 | 8412 (76.7)   | 2553 (23.3)       | <.001   |
| Face (BR2)                                      | 4727 (81.0)   | 1109 (19.0)       | <.001   |
| Thorax (BR3)                                    | 2838 (76.7)   | 865 (23.3)        | <.001   |
| Abdomen (BR4)                                   | 3607 (81.5)   | 820 (18.5)        | <.001   |
| Extremities (BR5)                               | 9271 (62.6)   | 5527 (37.4)       | <.001   |
| External (BR6)                                  | 15531 (76.1)  | 4866 (23.9)       | <.001   |

Abbreviations: U.S., United States; BR, body region; IQR, interquartile range.  
P-values calculated using chi-square, t-test, or Wilcoxon-Mann-Whitney test as appropriate.  
<sup>a</sup> 13,446 patients (44.9%) had no race/ethnicity data available.  
<sup>b</sup> 10 patients missing branch of service data.  
<sup>c</sup> Each patient had 1 to 6 injured body regions. For BI and NBI, dominant body region categories were tested as mutually exclusive categorical variables.

**eTable 2.** Top 10 Possible Causes of NBI by Theater of Operation

| Variable                                                                                                                                                                             | Overall |             | OEF     |            | OIF     |             | OND     |           |
|--------------------------------------------------------------------------------------------------------------------------------------------------------------------------------------|---------|-------------|---------|------------|---------|-------------|---------|-----------|
|                                                                                                                                                                                      | Ranking | No. (%)     | Ranking | No. (%)    | Ranking | No. (%)     | Ranking | No. (%)   |
| Fall                                                                                                                                                                                 | 1       | 2178 (21.3) | 1       | 778 (23.9) | 2       | 1326 (19.9) | 1       | 74 (24.8) |
| Motor vehicle crash                                                                                                                                                                  | 2       | 1921 (18.8) | 2       | 472 (14.5) | 1       | 1423 (21.4) | 4       | 26 (8.7)  |
| Machinery/ Equipment                                                                                                                                                                 | 3       | 1283 (12.6) | 3       | 349 (10.7) | 3       | 923 (13.9)  | 7       | 11 (3.7)  |
| Blunt Objects                                                                                                                                                                        | 4       | 1107 (10.8) | 4       | 294 (9.0)  | 4       | 790 (11.9)  | 5       | 23 (7.7)  |
| Bullet/ Gunshot wound/Firearm                                                                                                                                                        | 5       | 728 (7.1)   | 6       | 217 (6.7)  | 5       | 505 (7.6)   | 18      | 6 (2.0)   |
| Sport                                                                                                                                                                                | 6       | 697 (6.8)   | 5       | 285 (8.8)  | 7       | 379 (5.7)   | 2       | 63 (21.1) |
| Knife/Cut/Other sharp object                                                                                                                                                         | 7       | 563 (5.5)   | 7       | 168 (5.2)  | 6       | 384 (5.8)   | 7       | 11 (3.7)  |
| Crush                                                                                                                                                                                | 8       | 322 (3.2)   | 8       | 157 (4.8)  | 9       | 123 (1.8)   | 3       | 42 (14.1) |
| Fire/Flame                                                                                                                                                                           | 9       | 252 (2.5)   | 10      | 58 (1.8)   | 8       | 189 (2.8)   | 9       | 5 (1.7)   |
| Alter ROM                                                                                                                                                                            | 10      | 205 (2.0)   | 9       | 102 (3.1)  | 10      | 91 (1.4)    | 6       | 12 (4.0)  |
| Total of NBI patients                                                                                                                                                                | —       | 10203       | —       | 3250       | —       | 6655        | —       | 298       |
| Abbreviations: OEF, Operation Enduring Freedom; OIF, Operation Iraqi Freedom; OND, Operation New Dawn; Alter ROM (range of motion), Any non-sports related sprain/strain/dislocation |         |             |         |            |         |             |         |           |

Overall, the majority of non-battle related injuries were caused by falls, motor vehicle crashes, machinery/equipment, blunt objects, gunshot wounds, sports, knife/sharp objects, crush, fire/flame, and Altered ROM. The ranking of these causes were relatively consistent in OEF and OIF; however, they differed in OND.

**eTable 3. ARIMA Model Fit**

|                   | <b>ARIMA (1,0,1)</b> | <b>ARIMA (2,0,1)</b> |
|-------------------|----------------------|----------------------|
| Model estimates   |                      |                      |
| Constant estimate | 13.46                | 14.31                |
| Variance estimate | 96.99                | 99.12                |
| Model Parameters  |                      |                      |
| AIC               | 359.45               | 361.43               |
| SBC               | 365.07               | 368.91               |

To identify the best model for forecasting the proportion of non-battle injury (%NBI) through 2022 (a later cut-off year can also be chosen), the two ARIMA models were compared using the model AIC (359.45 vs. 361.43) and SBC (365.07 vs. 368.91) (eTable 3). The ARIMA (1, 0, 1) model was determined to be the most appropriate model for prediction of NBI (Figure 4).

**eFigure 1.** Number of Injured Body Regions per Patient by Injury Classification

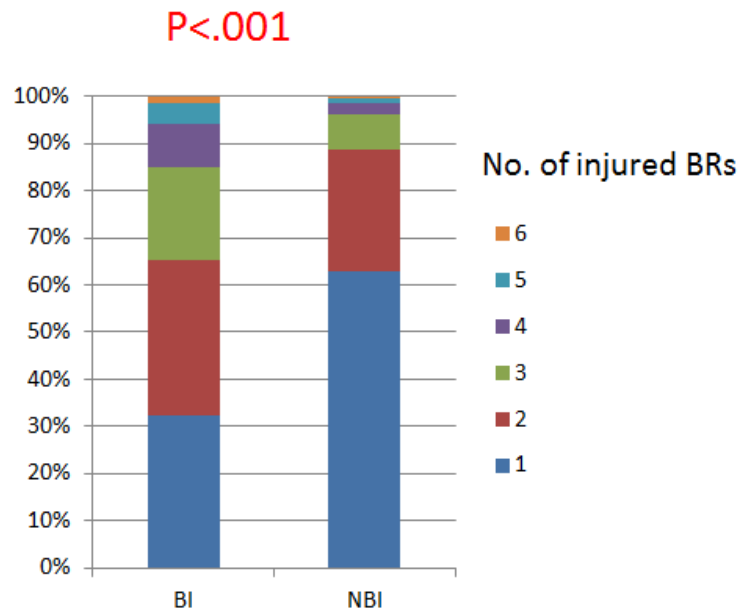

Abbreviations: BI, Battle injury; NBI, Non-battle injury

As shown in eFigure 1, Non-battle injury (NBI) was less likely to produce polytrauma compared to battle injury (BI). For example, 11.4% of NBI patients sustained injury to 3 or more body regions compared to 34.7% BI patients ( $P<.001$ ).

**eFigure 2.** Trends in Nonbattle Injury (NBI) Over Time

**A**

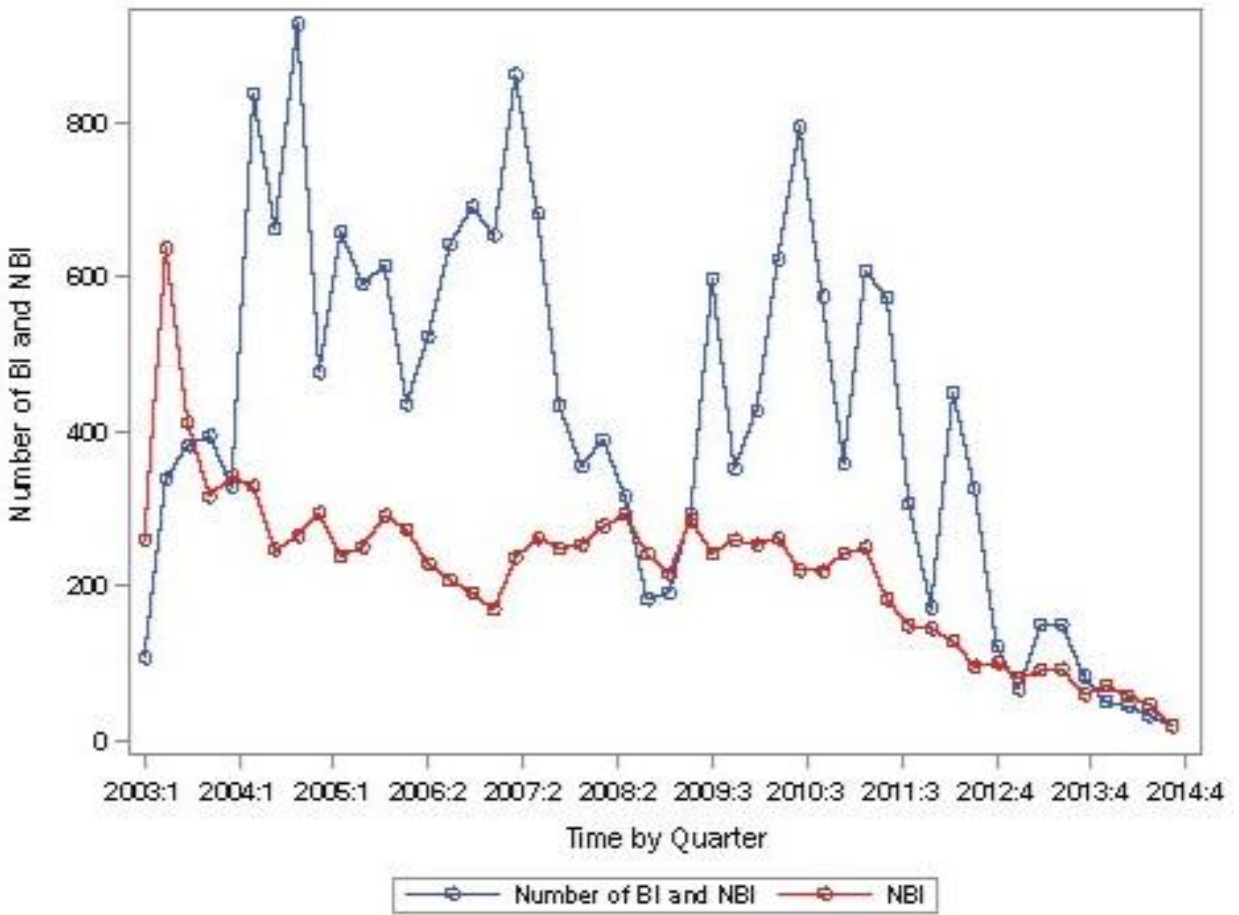

**B**

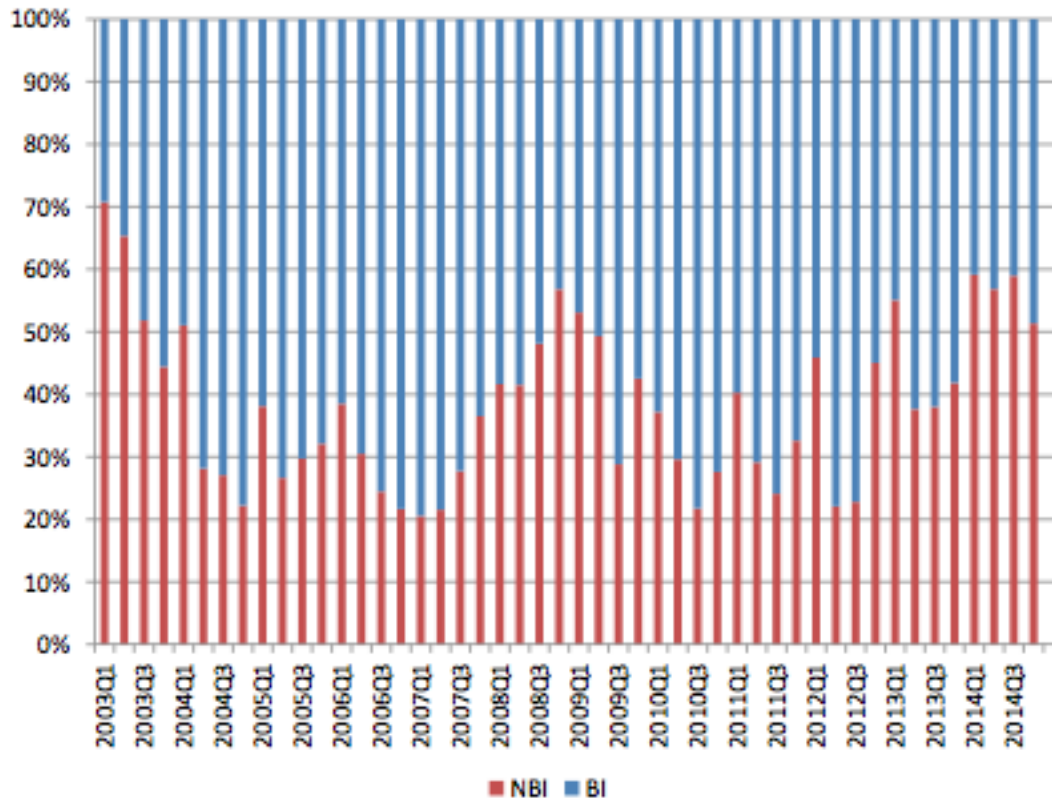

A, Frequency of battle injury (BI) and NBI that have declined over time. B, Proportion of BI and NBI.

**eFigure 3. Regression and Weighted Moving Average**

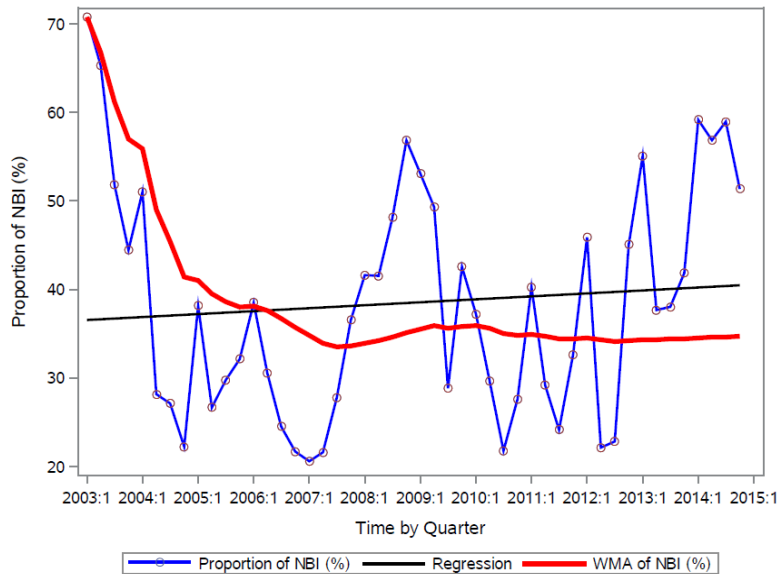

eFigure 3 depicts proportion of non-battle injury (%NBI) between 2003 and 2014 (blue line) and the associated regression fitted line (black line); the red line illustrates the weighted moving average of %NBI. The mean %NBI was  $38.8 \pm 8.8\%$  and the trend in %NBI decreased from 70% in 2003 to approximately 35% in 2006, then stabilized at approximately 35% thereafter. However, there was no statistically significant declining trend in %NBI ( $P=.76$ ).



**eFigure 4.** Trend and Correlation Analysis for Cumulative Proportion of NBI

**A.** Time plot of NBI cases (%) quarterly

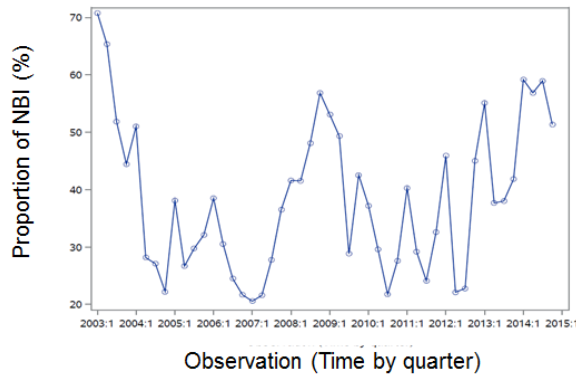

**B.** The autocorrelation function for NBI

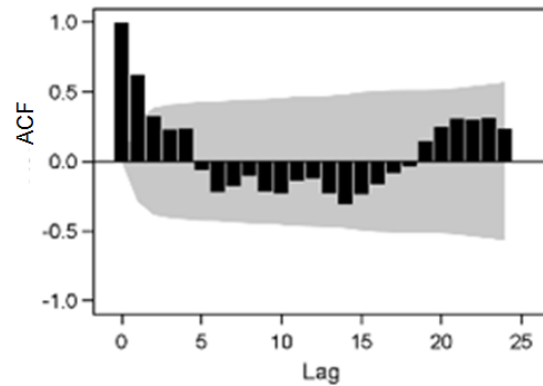

**C.** Partial autocorrelation function

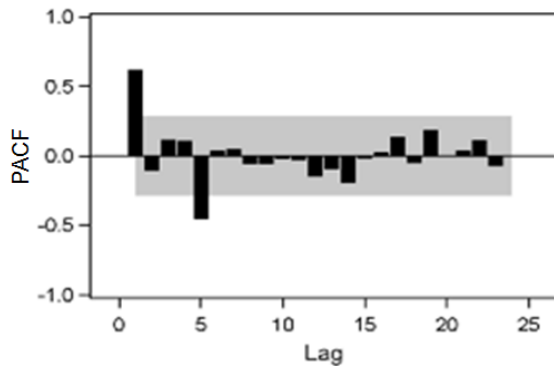

**D.** Inverse autocorrelation function

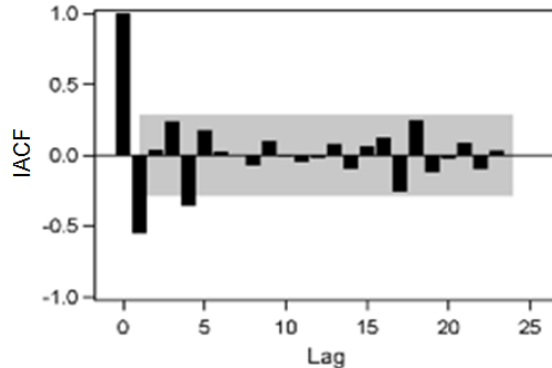

eFigure 4 illustrates the data exploration process used to determine the applicability of using time series analysis. The plot of the time series original data of cumulative %NBI without differencing ( $d=0$ ) indicated the data was not “white noise” ( $P<.05$ ). This suggests that the original data were stationary (eFigure 3 A-B).

The plot of the autocorrelation function (ACF) shows a rapid decay and cut-off at the lag 1 or lag 2 (eFigure 4B), suggesting the change in cumulative NBI incidence is a stationary time series correlating with either one or two previous values of the quarterly NBI cumulative incidence (lag 1 or 2). The test for “white noise” indicated that the change in NBI is highly autocorrelated (AR), with lag 1 or lag 2 ( $p=1$  or  $p=2$ ) models potentially being good models to describe this process. The partial autocorrelation function plots (PACF) show a sharp decay with a cut-off at lag 1 (eFigure 4C), suggesting the best model for the moving average (MA) utilizes lag 1 ( $q=1$ ). Therefore, for the model fitting, two ARIMA models were found suitable for prediction: ARIMA (1, 0, 1) Model (Figure 4) and ARIMA (2, 0, 1) Model (eFigure 5).

To identify the best model for forecasting the cumulative NBI incidence onward to year 2022 (a later cut-off year can also be chosen), the two ARIMA models were compared based on the values of AIC (359.45 vs. 361.43) and SBC (365.07 vs. 368.91) (eTable 3). The ARIMA (1, 0, 1) model was chosen as the most appropriate model for prediction of NBI (Figure 4). The ARIMA (1,0,1) model predicts that, assuming stable conditions with respect to battlefield injury risk, the cumulative incidence of NBI from 2015 to 2022 would be approximately 41.0% (95% CI: 37.8% to 44.3%).

**eFigure 5. ARIMA (2,0,1) Model**

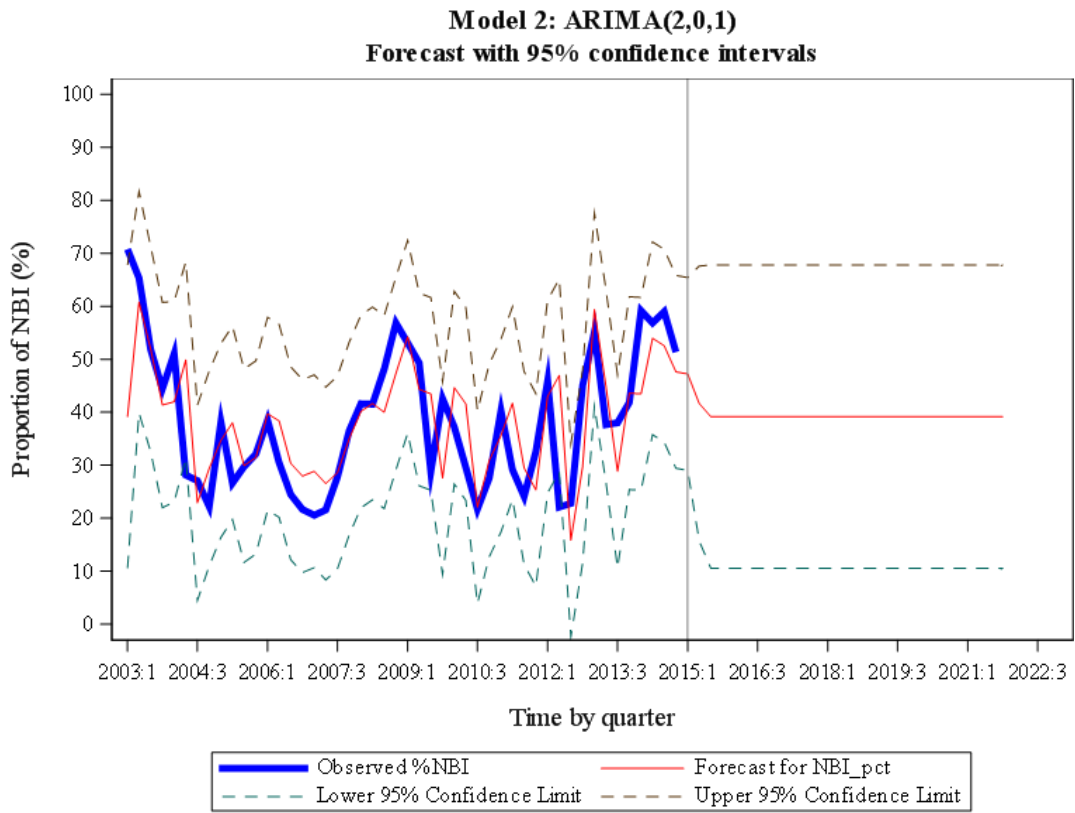

Results from the ARIMA (2, 0, 1) model were similar to the ARIMA (1,0,1) model (Figure 4)
